# Supplementary material for: A Multiparameter Diagnostic Model Based on MRI Volumetric ADC Histogram and Clinical Variables Accurately Differentiate Thymic Epithelial Tumors From Mediastinal Lymphomas
Source: Research Square preprint supplement (doi:10.21203/rs.3.rs-7688743/v1), 2025-10-15
Supplement: Supplementary file 1 [file 1133b45b8017d4a1bc6cca11.docx]

**Appendices**

**Table A1. MR imaging protocol in patients.**

| **Sequence** | Axial T1WI | Axial T2WI-TSE | T2WI-SPAIR | Axial DWI | Axial DCE |
| --- | --- | --- | --- | --- | --- |
| TR/TE (ms) | 4.0/1.42 | 15334/80 | 2725/76 | 2465/68 | 4.8/2.2 |
| FOV (mm2) | 380*296 | 420*281 | 380*380 | 360*360 | 370*278 |
| Matrix | 316*242 | 384*217 | 252*252 | 128*126 | 192*144 |
| Voxel | 1.2*1.22 | 1.1*1.28 | 1.39*1.81 | 2.86*2.85 | 1.93*1.93 |
| ST/gap (mm) | 5/2.5 | 4/1.5 | 5/1 | 5/1 | 4/2 |
| Average (NEX) | 1 | 1 | 1 | 1 | 1 |
| AT(s) | 20 | 31 | 87 | 170 | 208 |
| b value (s/mm2) | - | - | - | 0, 800 | - |

DCE, dynamic contrast enhancement; TR/TE, time of repetition/time of echo; FOV, field of view; ST, slice thickness; NEX, number of excitations; AT, acquisition.

**Table A.2 The inter-observer agreement for ADC histogram parameters and radiological features.**

| ADC histogram parameter | ICC/ κ coefficients | 95%CI |
| --- | --- | --- |
| 5th percentile ADC | 0.970 | (0.935, 0.986) |
| 10th percentile ADC | 0.986 | (0.968, 0.994) |
| 25th percentile ADC | 0.997 | (0.993, 0.999） |
| 50th percentile ADC | 0.998 | (0.995, 0.999） |
| 75th percentile ADC | 0.994 | (0.985, 0.997） |
| 90th percentile ADC | 0.986 | (0.962, 0.994） |
| 95th percentile ADC | 0.974 | (0.929, 0.989） |
| ADCmin | 0.943 | (0.879, 0.974） |
| ADCmax | 0.870 | (0.733, 0.939） |
| ADCmean | 0.996 | (0.991, 0.998） |
| Skewness | 0.918 | (0.827, 0.962) |
| Calcification | 1 | (1,1) |
| Cyst | 0.950 | (0.895-1.006) |
| Contour | 0.943 | (0.879-1.007) |

ICC, interclass correlation coefficient, CI, confidence interval.

**Appendices Note 1: CT imaging protocol in patients.**

All CT scans were performed using the following scanners: iCT 256 (Philips, Cleveland), Ingenuity core128 (Philips, Cleveland), Revolution CT (GE, Waukesha), and Discovery CT750 HD (GE, Waukesha). CT scans were performed with a tube voltage of 120 kVp, automated mAs exposure, pitch of 1.0. Images were reconstructed at 1.0 mm thickness and 1.0 mm interval using standard kernels. Scan field was from the lung apex to the middle portion of both kidneys.

**Appendices Note 2.** **Example of contour typing and contrast-enhanced chest MRI examples of contour.**


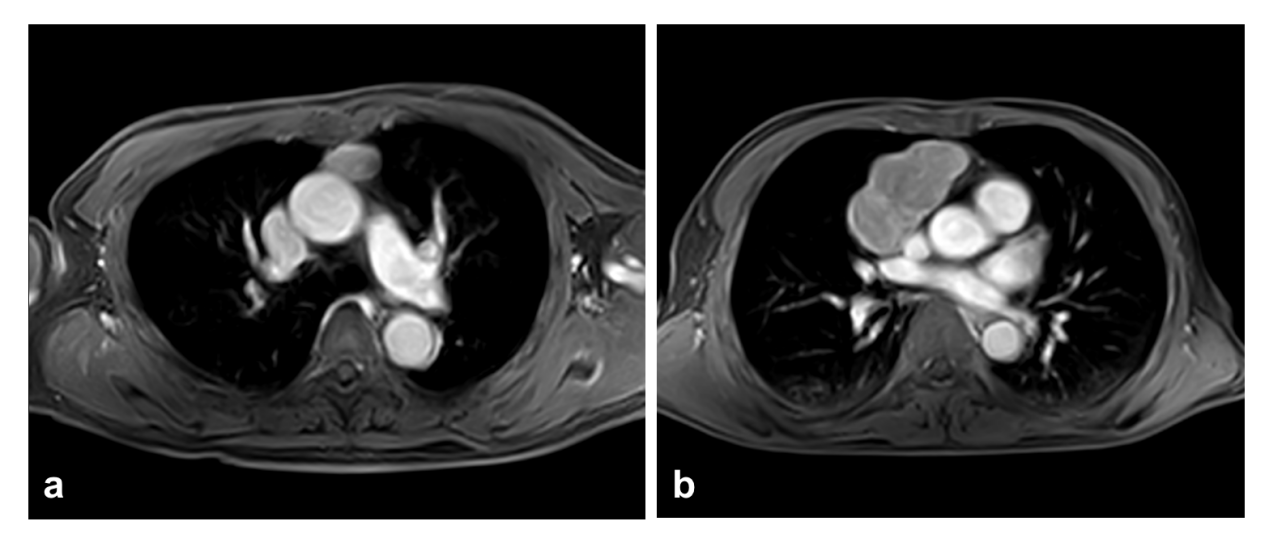
a, Smooth contour. b, Lobulated contour

Reference:

Marom EM, Rosado-de-Christenson ML, Bruzzi JF, Hara M, Sonett JR, Ketai L. Standard report terms for chest computed tomography reports of anterior mediastinal masses suspicious for thymoma. J Thorac Oncol. 2011 Jul;6(7 Suppl 3):S1717-23.
